# Supplementary material
Source: PubMed Central journal article supplement (PMC4930894)
Supplement: NIHMS783278-supplement-3.pdf [file NIHMS783278-supplement-3.pdf]

Table S1.A Demographic parameters

| <u>Characteristic</u> | <u>Value</u> |
|-----------------------|--------------|
| Age                   |              |
| Average               | 70.4         |
| Maximum               | 89           |
| Minimum               | 48           |
| Median                | 70           |
| Ethnicity             |              |
| Caucasian             | 59           |
| Hispanic              | 1            |
| African-American      | 19           |
| Asian                 | 2            |
| Gender                |              |
| Male                  | 41           |
| Female                | 40           |

Table S1.B: Tumor characteristics

| <u>Characteristic</u>                 | <u>Value</u> |
|---------------------------------------|--------------|
| Primary diagnosis code                |              |
| Upper lobe, bronchus or lung(162.3)   | 42           |
| Middle lobe, bronchus or lung(162.4)  | 3            |
| Lower lobe, bronchus or lung(162.5)   | 28           |
| Bronchus and lung, unspecified(162.9) | 8            |
| Central tumor or not                  |              |
| Central                               | 23           |
| Peripheral                            | 58           |
| Tumor size (cm)                       |              |
| Average                               | 2.4          |
| Maximum                               | 6            |
| Minimum                               | 1            |
| Histology                             |              |
| Adenocarcinoma                        | 44           |
| Squamous cell                         | 22           |
| Bronchoalveolar                       | 2            |
| Not biopsied                          | 2            |
| Poorly differentiated                 | 2            |
| Biopsied                              | 9            |
| Location                              |              |
| RUL                                   | 27           |
| RML                                   | 2            |
| RLL                                   | 16           |
| LUL                                   | 21           |
| LLL                                   | 15           |
| Stage                                 |              |

|    |    |
|----|----|
| IA | 63 |
| IB | 18 |

Abbreviations: RUL: Right upper lobe; RML: Right middle lobe;  
RLL: right lower lobe; LUL: Left upper Lobe; LLL: Left lower lobe;

Table S1.C Treatment parameters

| <u>Characteristic</u>  | <u>Value</u> |
|------------------------|--------------|
| Number fractions       |              |
| Maximum                | 5            |
| Minimum                | 1            |
| Median                 | 3            |
| Dose per fraction (Gy) |              |
| Maximum                | 34           |
| Minimum                | 8            |
| Median                 | 16           |
| BED (Gy)               |              |
| Maximum                | 200.5        |
| Minimum                | 52.8         |
| Median                 | 140.8        |

*Abbreviation* – BED: biological equivalent dose

Table S1.D Pretreatment medicine

| <u>Characteristic</u> | <u>Value</u> |
|-----------------------|--------------|
| Antiinflammatories    |              |
| No                    | 77           |
| Yes                   | 4            |
| Anitdiabetic          |              |
| No                    | 79           |
| Yes                   | 2            |
| Metformin             |              |
| No                    | 78           |
| Yes                   | 3            |
| Statin                |              |
| No                    | 51           |
| Yes                   | 30           |
| ACE inhibitor         |              |
| No                    | 54           |
| Yes                   | 27           |
| ASA                   |              |
| No                    | 50           |
| Yes                   | 31           |

*Abbreviations* -ACE inhibitor: Angiotensin-converting-enzyme inhibitor;  
ASA: Acetylsalicylic acid.

Table S2 Effects of selected optimal clinical parameters

| Clinical parameter   | Value          | Odds Ratio |
|----------------------|----------------|------------|
| Age                  | $\geq 70$      | Reference  |
|                      | $<70$          | 1.950      |
| Ethnicity            | Caucasion      | Reference  |
|                      | Black          | 3.195      |
| Gender               | Male           | Reference  |
|                      | Female         | 2.812      |
| Central tumor or not | Peripheral     | Reference  |
|                      | Central        | 1.820      |
| Tumor size           | $< 2.5$        | Reference  |
|                      | $\geq 2.5$     | 1.466      |
| Histology            | Adenocarcinoma | Reference  |
|                      | Squamous cell  | 1.086      |
| Stage                | IA             | Reference  |
|                      | IB             | 4.476      |
| Fractions            | 3              | Reference  |
|                      | 5              | 2.500      |
| Dose per fraction    | $\geq 18$      | Reference  |
|                      | $<18$          | 2.520      |
| Antiinflammatories   | No             | Reference  |
|                      | Yes            | 1.091      |
| Anitdiabetic         | No             | Reference  |
|                      | Yes            | 3.364      |
| Metformin            | Yes            | Reference  |
|                      | No             | 1.239      |
| Statin               | Yes            | Reference  |
|                      | No             | 1.037      |
| ACE inhibitor        | Yes            | Reference  |
|                      | No             | 1.504      |
| ASA                  | Yes            | Reference  |
|                      | No             | 2.825      |
